# Supplementary material
Source: Springer Nature journal article supplement (https://www.springermedizin.de/resource/supplementary/12913_2002_43_MOESM1_ESM.doc/9534128)
Supplement: MOESM1 [file 9534128]

Table 4. Multiple regression of SPMSQ scores, social support and characteristics

| Variable | Coefficients (s.e.) | T value | P-value |
| --- | --- | --- | --- |
| Intercept | 12.30(0.29) | 42.97 | <.0001 |
| Social Support  Married | 0.13(0.04) | 2.81 | 0.005 |
| Perceives positive support | 0.11(0.04) | 2.79 | 0.005 |
| Feels lonely | -0.03(0.03) | -1.09 | 0.276 |
| Lives alone | 0.09(0.07) | 1.25 | 0.210 |
| Age | -0.03(0.00) | -9.40 | <.0001 |
| Female *vs*. male | -0.38(0.06) | -6.57 | <.0001 |
| Education  Grade School *vs*. High School  College *vs*. High School | -0.22(0.05)  -0.05(0.09) | -4.37  -0.58 | <.0001  0.564 |
| Religion  Christian *vs*. Buddhist  Catholic *vs*. Buddhist | 0.16(0.08)  0.04(0.15) | 2.01  0.26 | 0.078  0.793 |
| Occupation  Farmer *vs*. white collar  Blue collar *vs*. white collar  Prof-Admin *vs*. white collar  Housewife *vs*. white collar  Retirement *vs*. white collar | -0.61(0.10)  -0.18(0.07)  -0.08(0.07)  -0.09(0.09)  -0.11(0.08) | -5.88  -2.40  -1.19  -1.12  -1.37 | <.0001  0.016  0.233  0.264  0.172 |
| ADL | -0.01(0.01) | -0.56 | 0.578 |
| IADL | -0.14(0.01) | -15.35 | <.0001 |
| Reported Health Conditions  CVA  Hypertension  DM  CHD  Cancer  Parkinson’s  Depression  Vision problem  Hearing problem  Dental problem | -0.02(0.11)  0.07(0.04)  0.02(0.07)  0.11(0.08)  0.40(0.26)  -0.52(0.35)  -0.79(0.37)  -0.24(0.08)  0.23(0.19)  0.16(0.15) | -0.21  1.56  0.26  1.30  1.56  -1.49  -2.14  -3.16  1.21  1.06 | 0.835  0.118  0.796  0.195  0.118  0.136  0.031  0.017  0.227  0.287 |
| Adjusted R-square | 0.2019 |  |  |
| F-value | 40.33 |  | <.0001 |

s.e. = standard error
